# Supplementary material for: Structure-controllable superhydrophobic Cu meshes for effective separation of oils with different viscosities and aqueous pollutant purification
Source: Royal Society of Chemistry journal article supplement (doi:10.1039/c6ra00346j), 2016-01-01
Supplement: c6ra00346j1.pdf [file c6ra00346j1.pdf]

# Supplementary Information

## **Structure-controllable superhydrophobic Cu meshes for effective separation of oils with different viscosities and aqueous pollutant purification**

*Stephen Boakye-Ansah<sup>1</sup>, Yong Taek Lim<sup>1</sup>, Ha-Jin Lee<sup>2\*</sup>, and Won San Choi<sup>1\*</sup>*

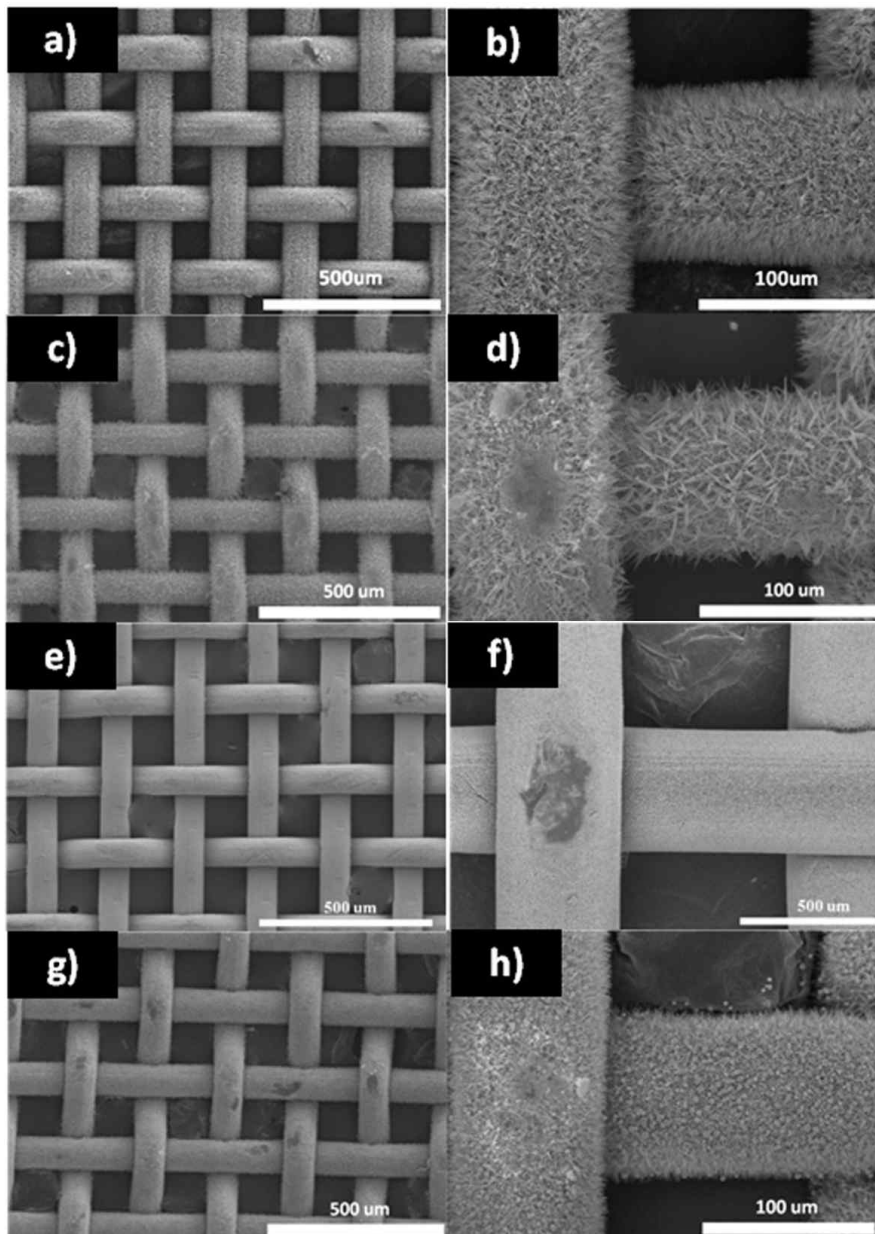

**Figure S1.** Low magnified SEM images of (a, b) NL, (c, d) HL, (e, f) AL, and (g, h) PNL meshes.

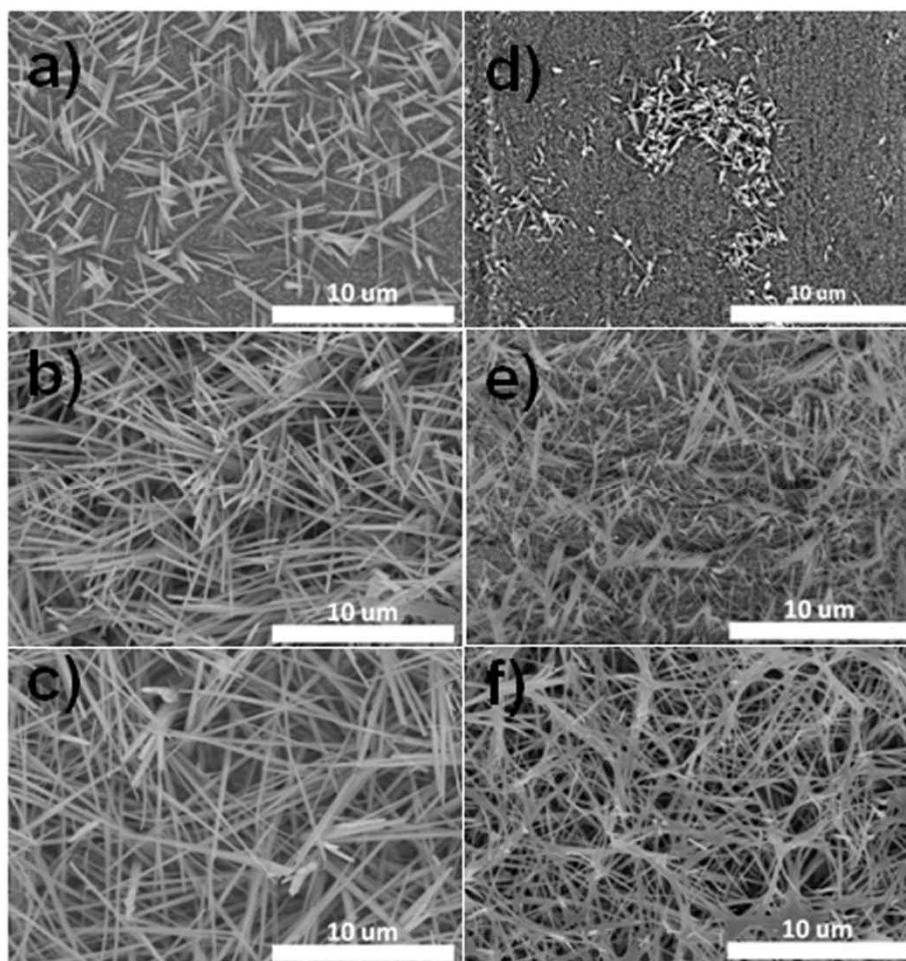

**Figure S2.** SEM images of the Cu mesh/CuO-Cu(OH)<sub>2</sub> as a function of reaction time and temperature. (a) (R.T., 10 min), (b) (R.T., 20 min), (c) (R.T., 30 min), (d) (40 °C, 10 min), (e) (40 °C, 20 min), and (f) (40 °C, 30 min).

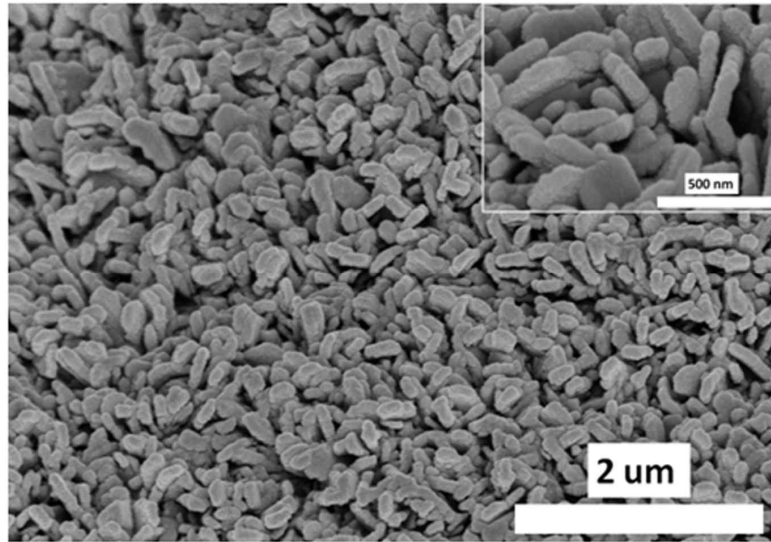

**Figure S3.** SEM images of the MPO-Cu mesh (Cu mesh/CuO-Cu(OH)<sub>2</sub>) obtained after oxidation for 50 min.

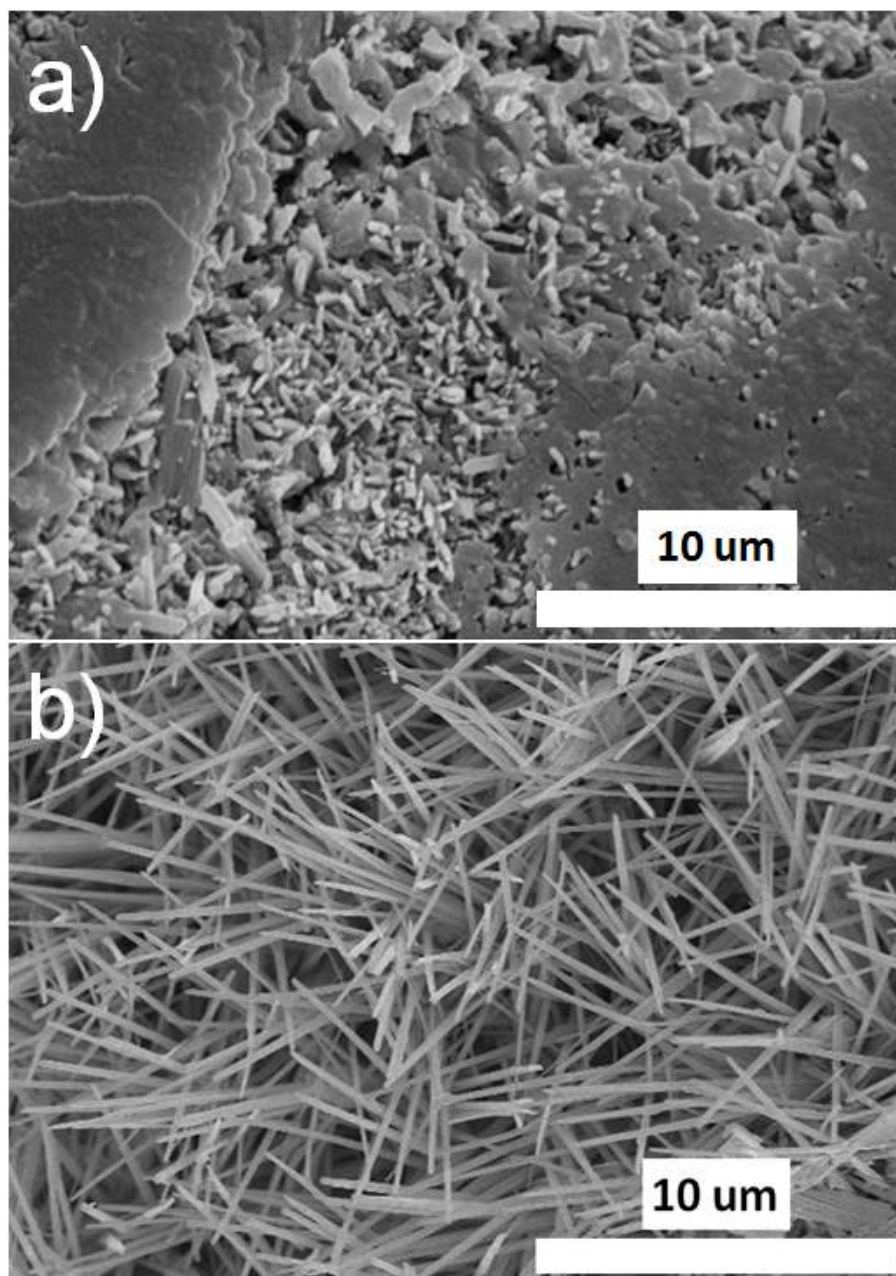

**Figure S4.** SEM images of the MPO-Cu mesh/PFTOS (a) before and (b) after annealing.

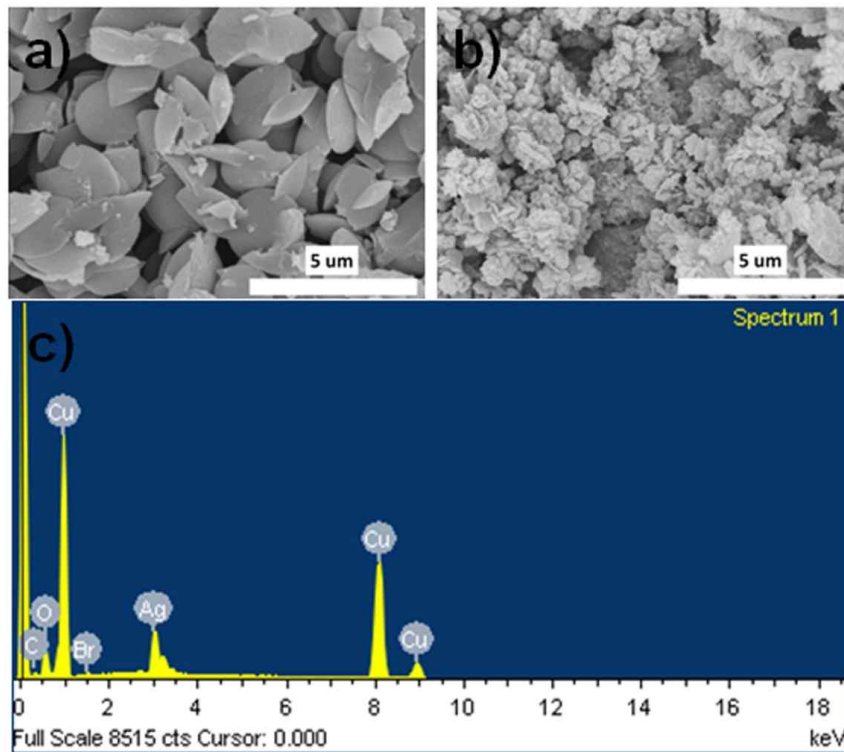

**Figure S5.** SEM images of (a) a MPO-Cu mesh/Pdop and (b) a MPO-Cu mesh/Pdop/Ag/AgBr. (c) EDX data of a MPO-Cu mesh/Pdop/Ag/AgBr.

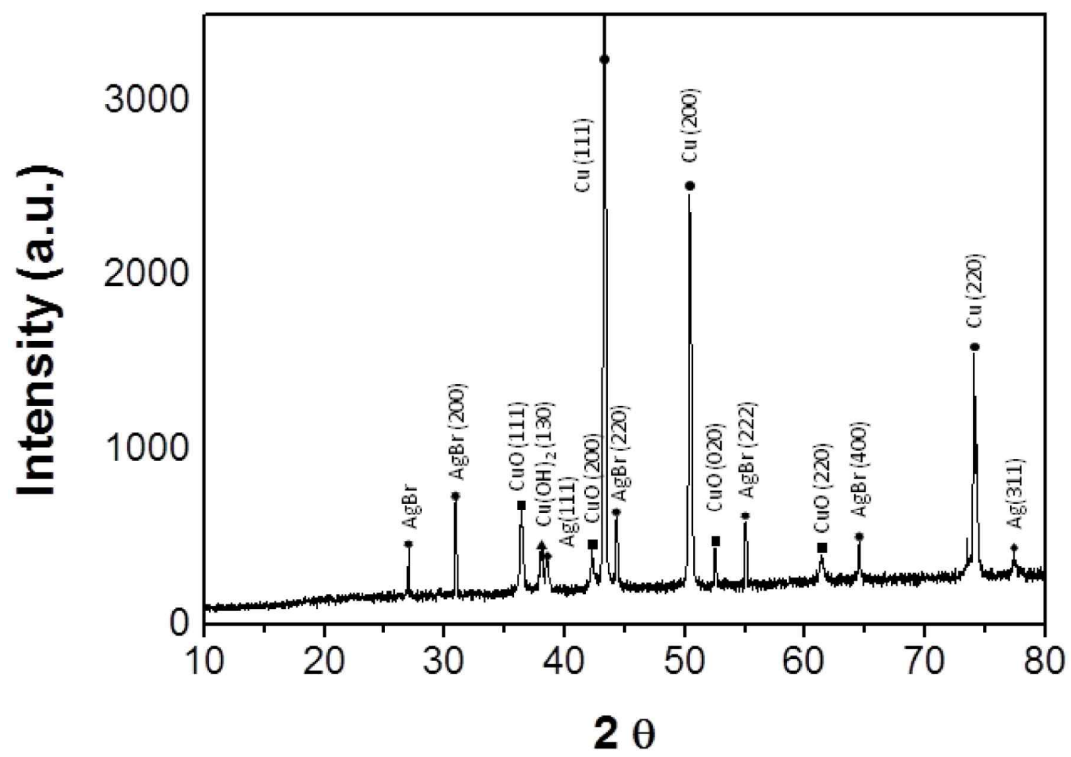

**Figure S6.** XRD pattern of a MPO-Cu mesh/Pdop/Ag/AgBr.

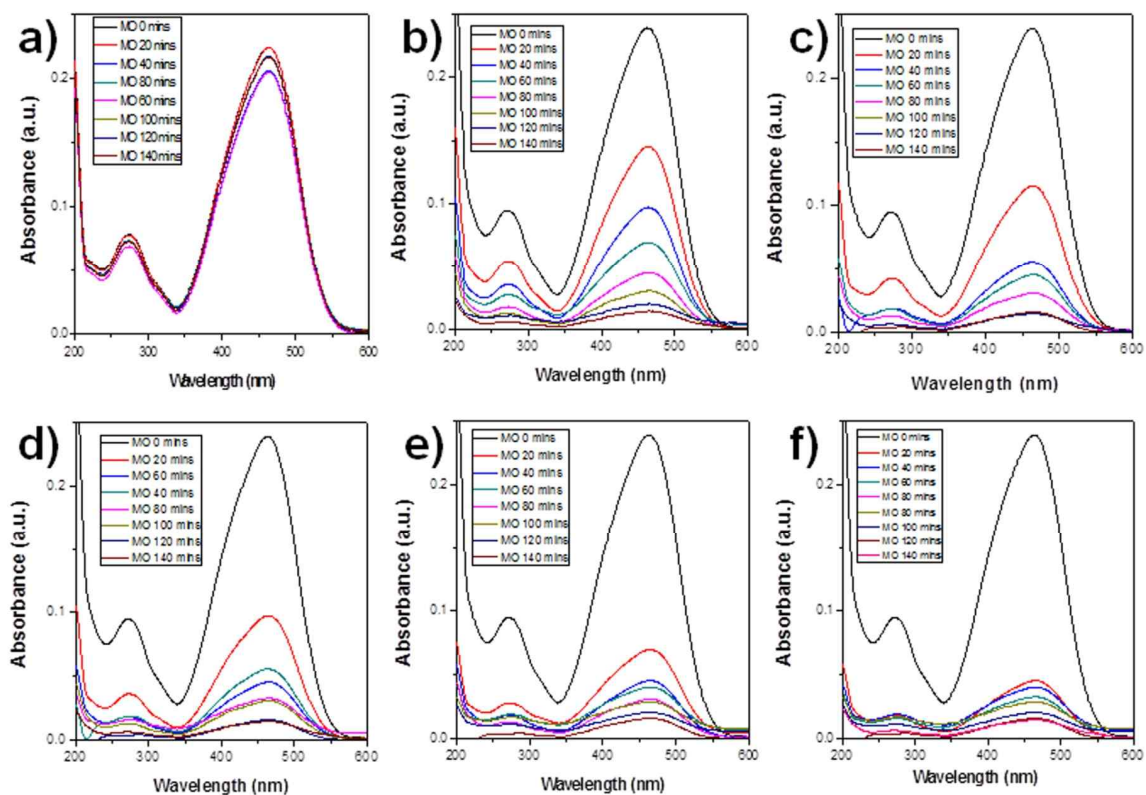

**Figure S7.** UV-vis spectra showing the decomposition of MO dyes catalysed by a photocatalytic mesh under visible-light irradiation: (a) without photocatalyst, (b) 1<sup>st</sup> cycle, (c) 2<sup>nd</sup> cycle, (d) 3<sup>rd</sup> cycle, (e) 4<sup>th</sup> cycle, and (f) 5<sup>th</sup> cycle.



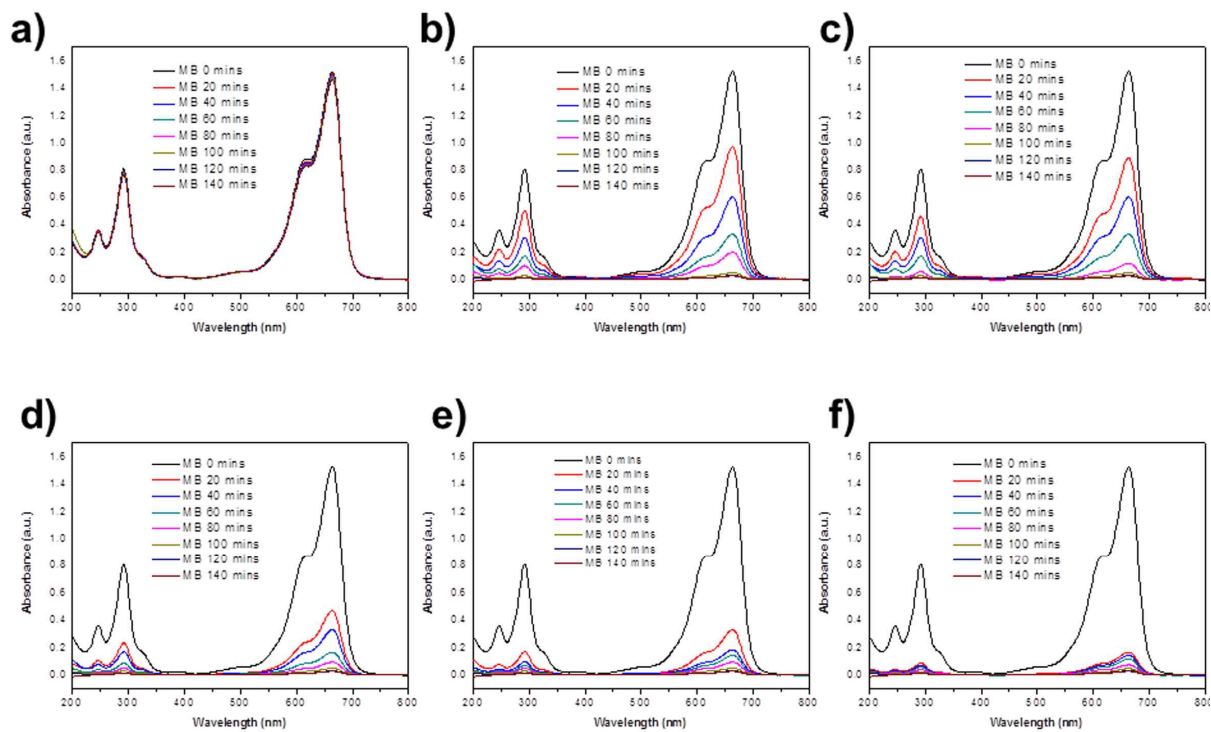

**Figure S8.** UV-vis spectra showing the decomposition of MB dyes catalysed by a photocatalytic mesh under visible-light irradiation: (a) without photocatalyst, (b) 1<sup>st</sup> cycle, (c) 2<sup>nd</sup> cycle, (d) 3<sup>rd</sup> cycle, (e) 4<sup>th</sup> cycle, and (f) 5<sup>th</sup> cycle.
